# Supplementary material for: Estimating virus effective population size and selection without neutral markers
Source: PubMed Central journal article supplement (PMC5720836; doi:10.1371/journal.ppat.1006702), 2017-11-20
Supplement: ppat.1006702.s003.pdf [file ppat.1006702.s003.pdf]

# Supplementary Information – Text S3: Heritability of the intensity of selection and genetic drift exerted by plants on virus populations

Heritabilities were estimated by creating two dataset replicates of 24 randomly chosen plants for each DH line, each one including 4 plants at each sampling date. This random split was repeated 8 times in order to obtain 8 heritability estimates per variable of interest. Heritabilities were assessed for (i) the intrinsic rates of increase  $r_i$  of each virus variant  $i$ , (ii) the virus effective population size in the inoculated organ  $\eta_e^{IO}$  and (iii) the virus effective population size during systemic infection  $\eta_e^S$ . With 24 plants in each dataset, a simpler  $N_e(t_g)$  piecewise function with only two parameters was used:  $N_e(t) = \eta_e^{IO}$  when  $t \in [1, 6]$  and (ii)  $N_e(t) = \eta_e^S$  when  $t \in [7, 34]$ . The table below provides the mean heritabilities over the 8 repetitions of  $r_i$  (averaged over the 5 virus variants),  $\eta_e^{IO}$  and  $\eta_e^S$ . Additionally, the last column provides the range of variation of the heritabilities over the 8 repetitions.

Table 1: **Heritability estimations.**

| Variable      | Mean heritability | Range of variation |
|---------------|-------------------|--------------------|
| $r_i$         | 0.94              | [0.76; 0.98]       |
| $\eta_e^{IO}$ | 0.64              | [0.36; 0.89]       |
| $\eta_e^S$    | 0.63              | [0.47; 0.85]       |
