# Supplementary material for: Estimating virus effective population size and selection without neutral markers
Source: PubMed Central journal article supplement (PMC5720836; doi:10.1371/journal.ppat.1006702), 2017-11-20

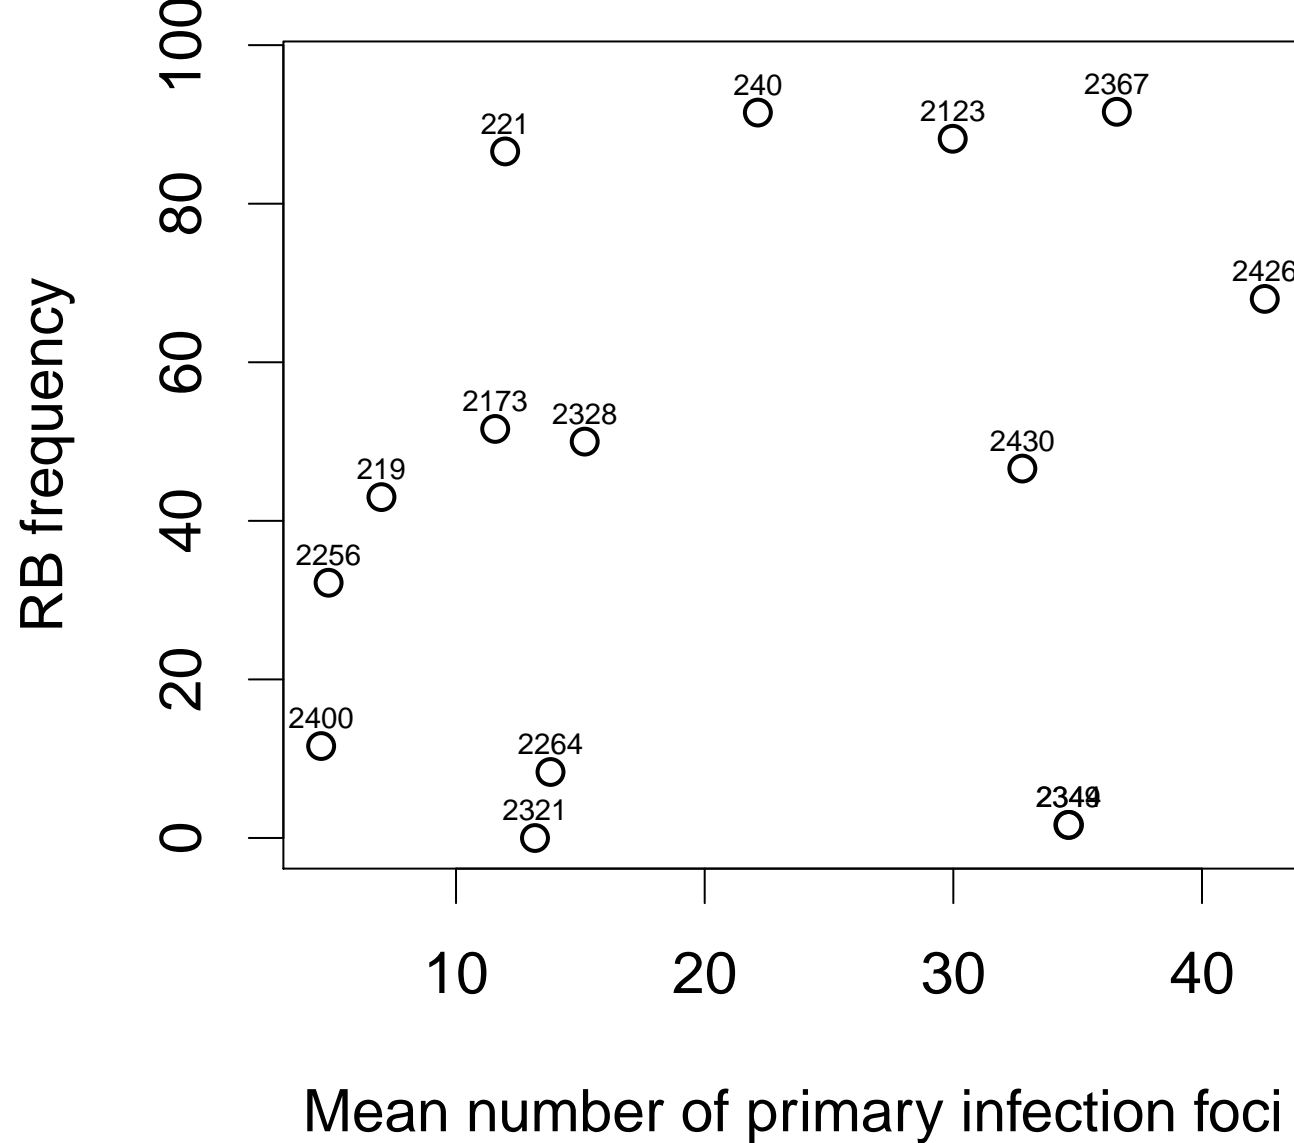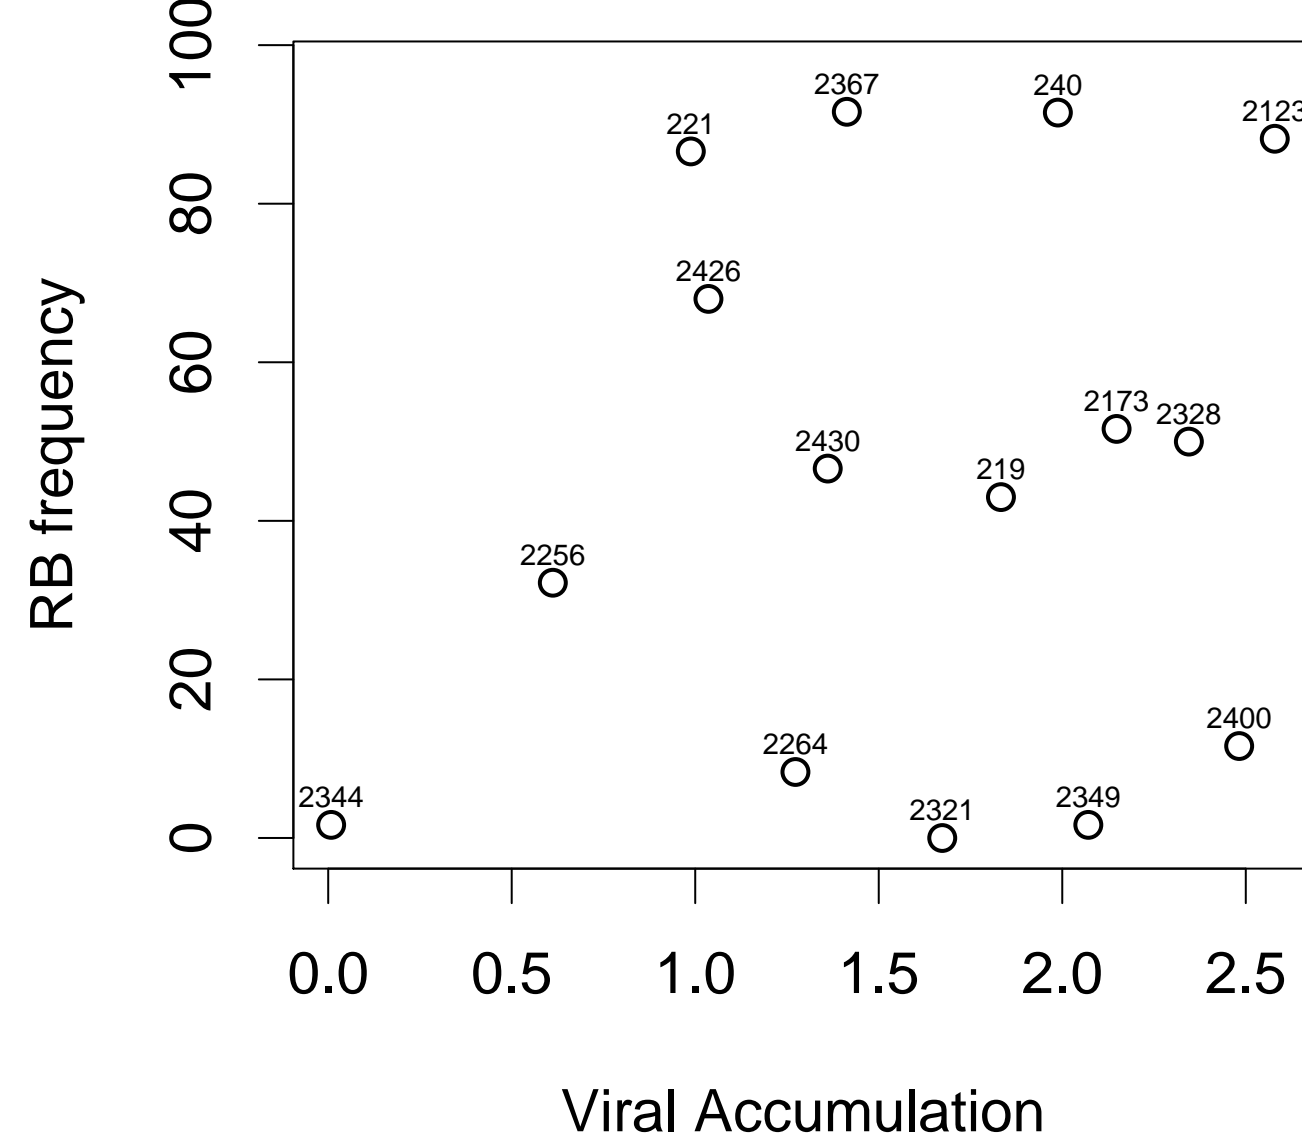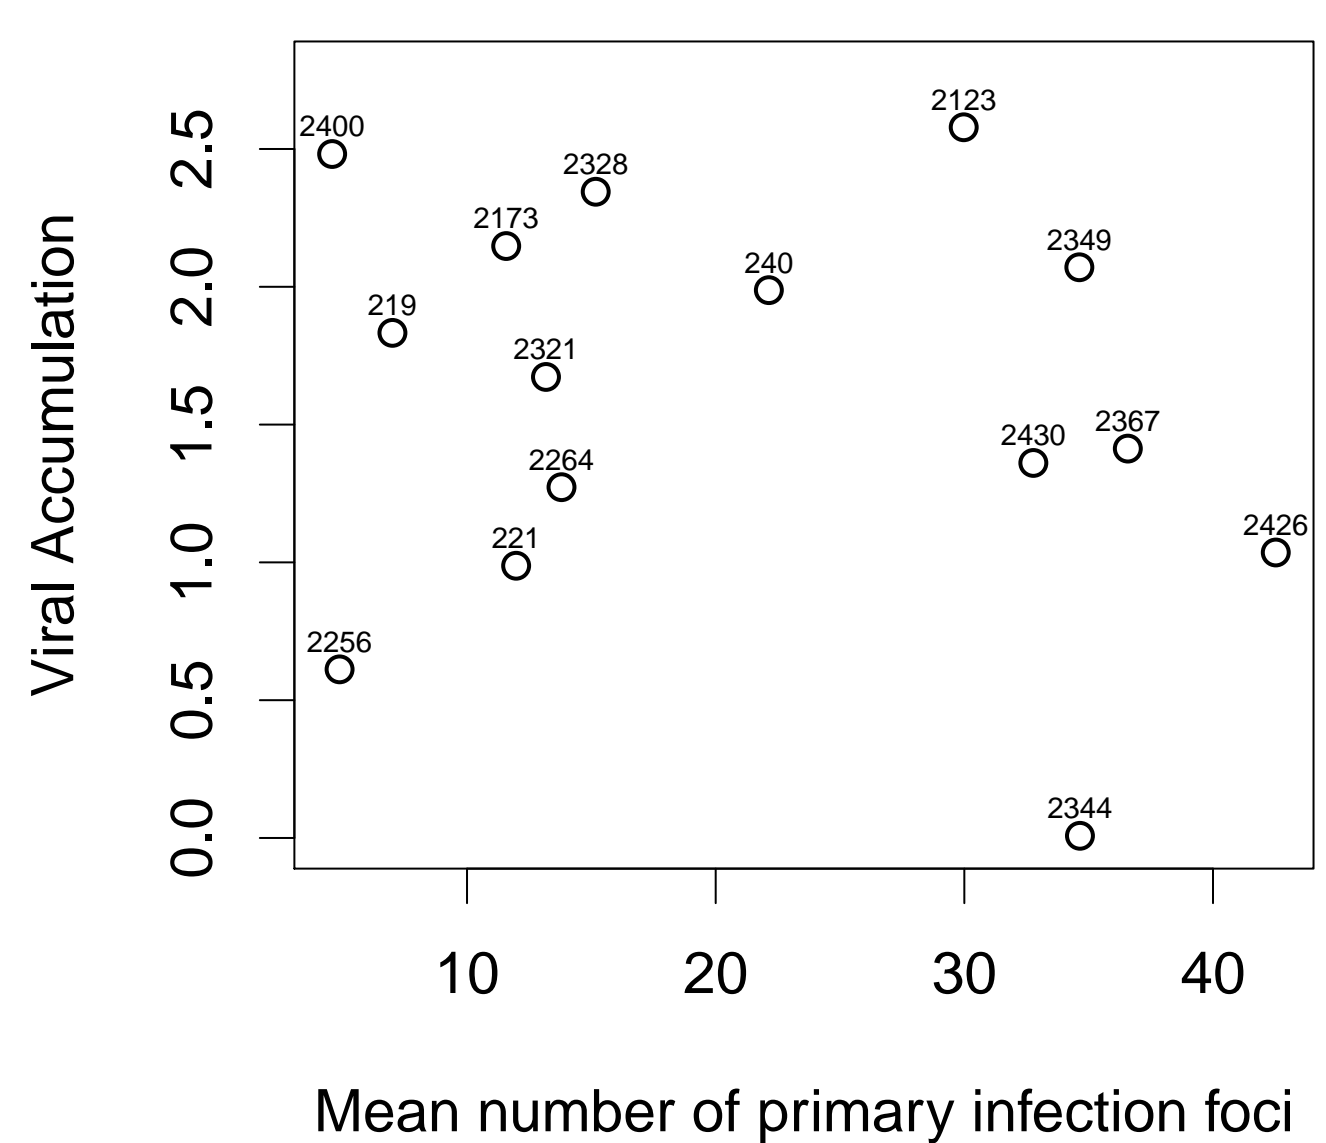

Supplement: ppat.1006702.s004.pdf [file ppat.1006702.s004.pdf]
