# Supplementary material for: Estimating virus effective population size and selection without neutral markers
Source: PubMed Central journal article supplement (PMC5720836; doi:10.1371/journal.ppat.1006702), 2017-11-20

■ Variant G ■ Variant N ■ Variant K ■ Variant GK ■ Variant KN

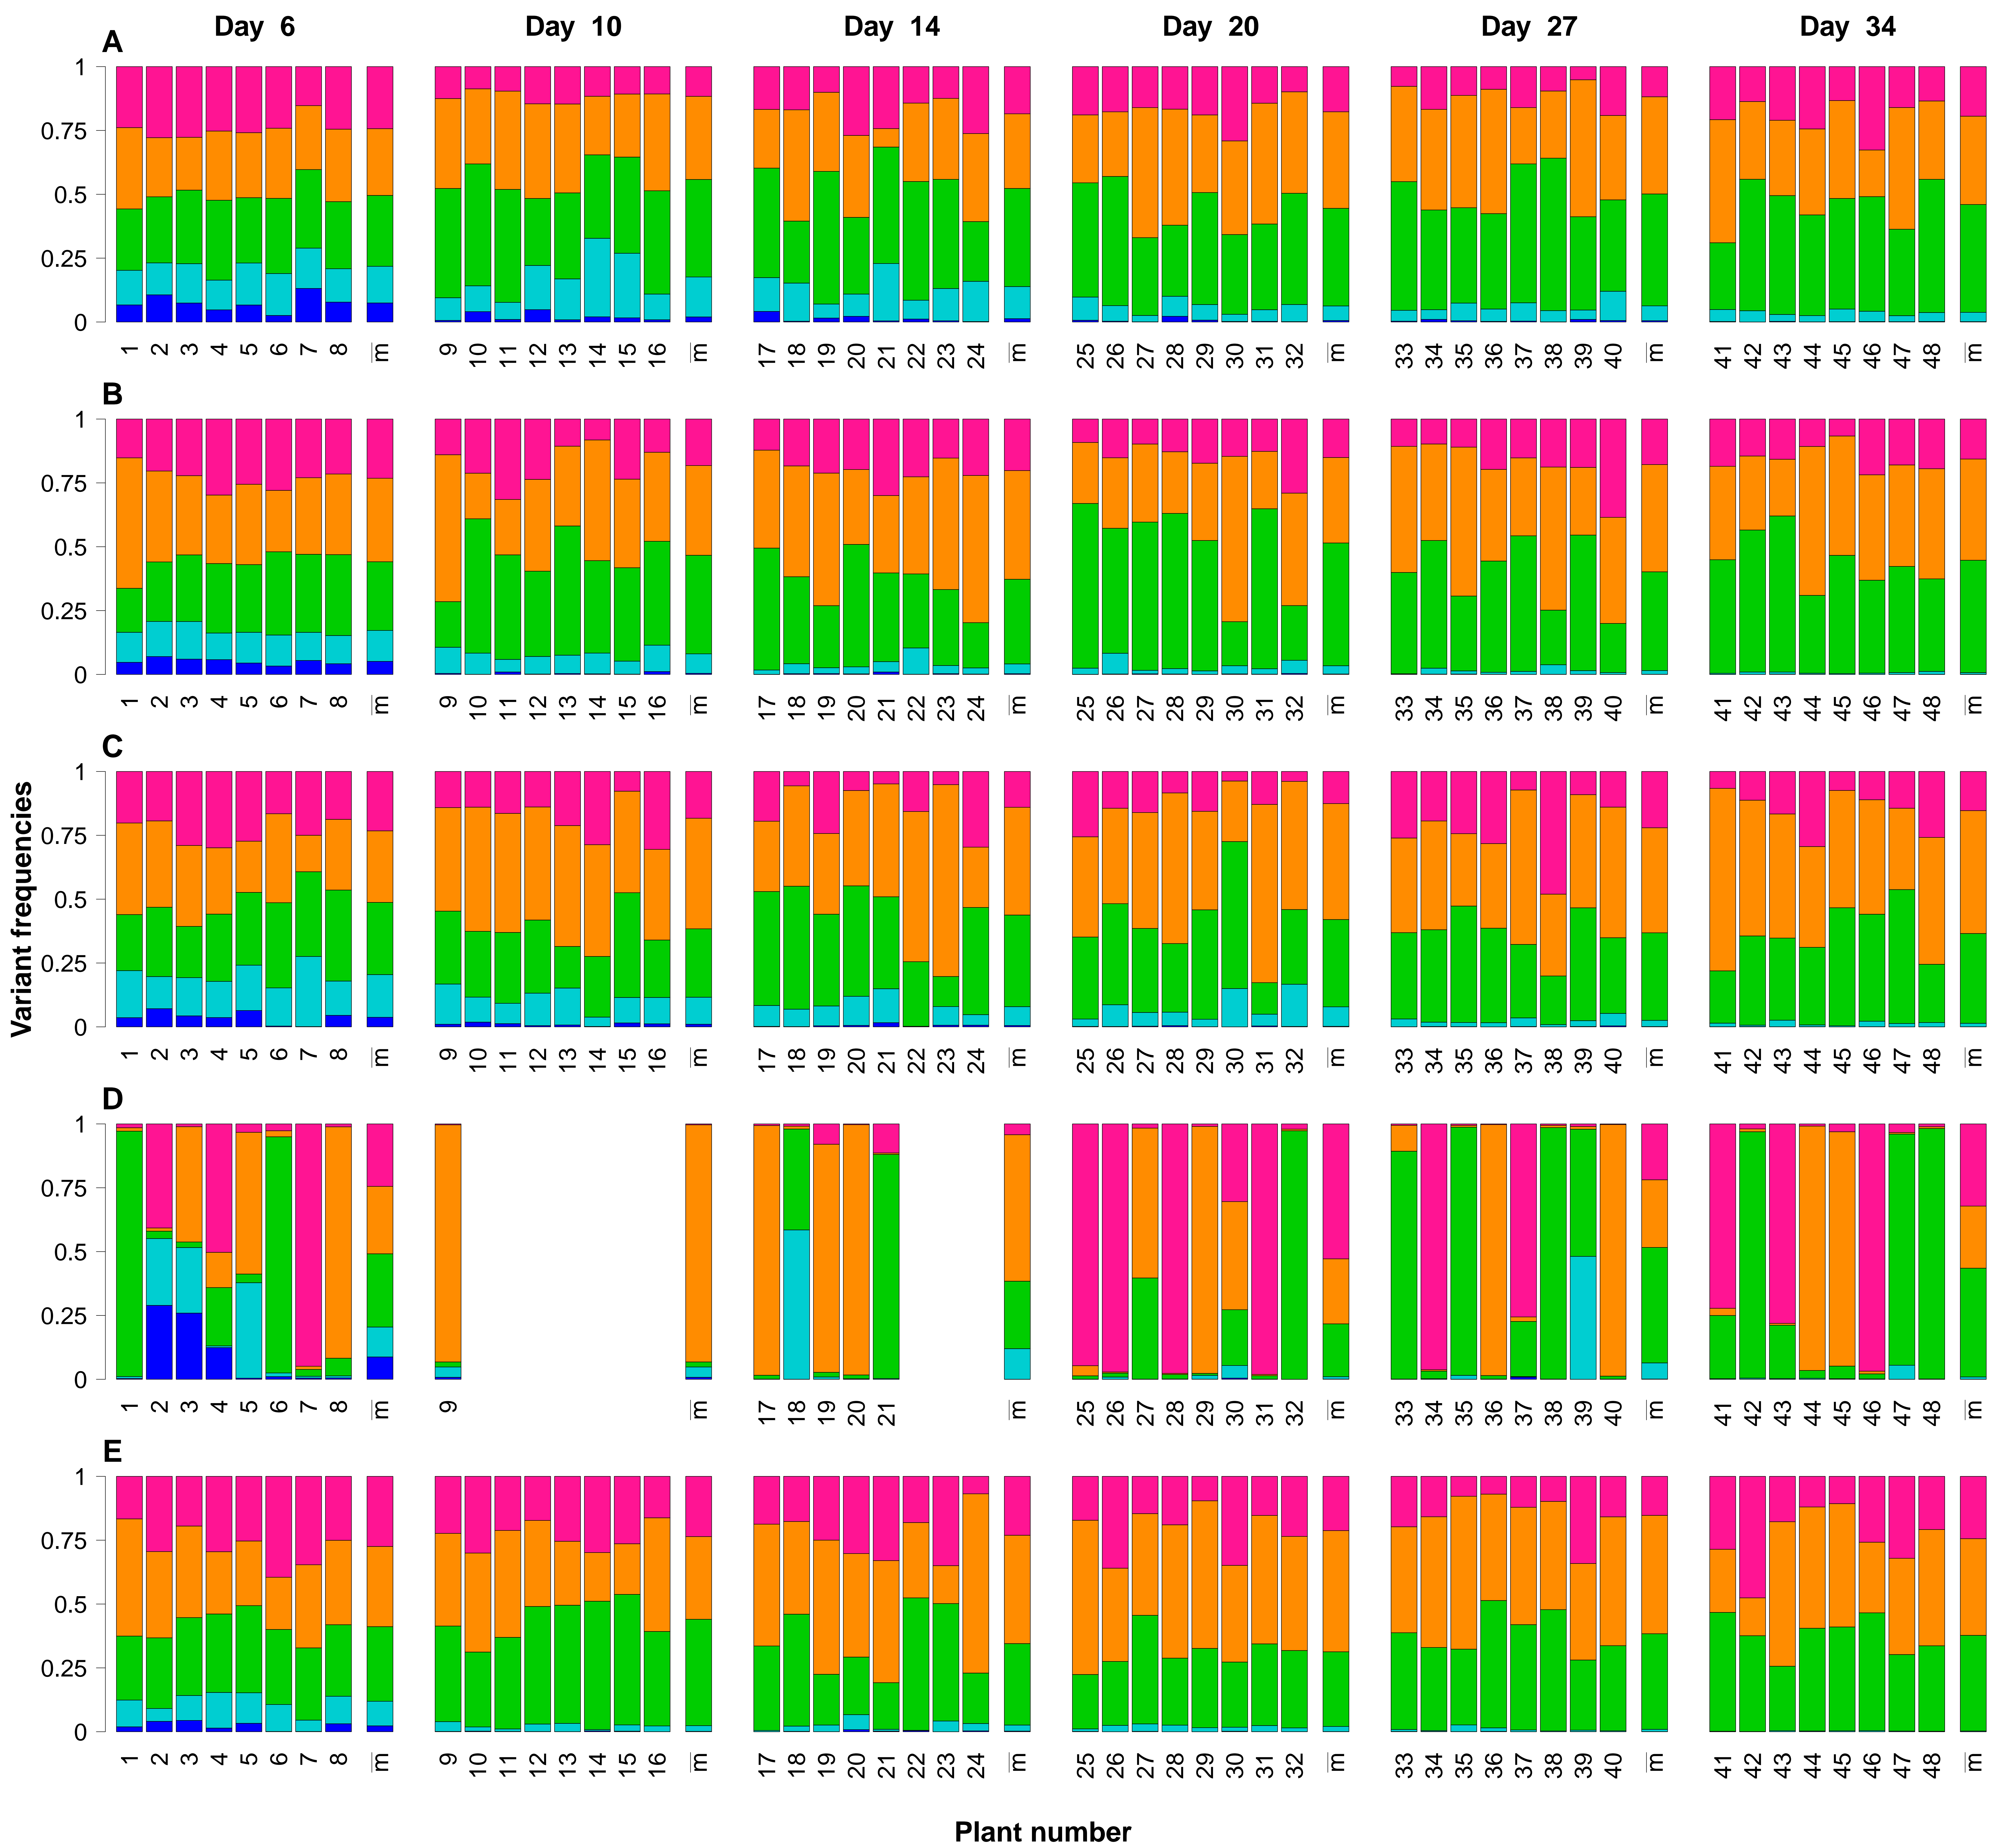

Supplement: ppat.1006702.s005.pdf [file ppat.1006702.s005.pdf]
