# Supplementary material for: Estimating virus effective population size and selection without neutral markers
Source: PubMed Central journal article supplement (PMC5720836; doi:10.1371/journal.ppat.1006702), 2017-11-20
Supplement: ppat.1006702.s008.pdf [file ppat.1006702.s008.pdf]

| Name     | Polarity | Sequence for binding libraries  | Tag sequence | Primer sequence         |
|----------|----------|---------------------------------|--------------|-------------------------|
| Tag 1    | +        | 5'-CTTTCCCTACACGACGCTCTTCCGATCT | ACGAGTGCGT   | AAGAGAATGTCTATGCTGAC-3' |
| Tag 2    | +        | 5'-CTTTCCCTACACGACGCTCTTCCGATCT | CATAGTAGTG   | AAGAGAATGTCTATGCTGAC-3' |
| Tag 3    | +        | 5'-CTTTCCCTACACGACGCTCTTCCGATCT | GGTCTAGTAC   | AAGAGAATGTCTATGCTGAC-3' |
| Tag 4    | +        | 5'-CTTTCCCTACACGACGCTCTTCCGATCT | TCATACGCGT   | AAGAGAATGTCTATGCTGAC-3' |
| Tag 5    | +        | 5'-CTTTCCCTACACGACGCTCTTCCGATCT | CTACGCTCTA   | AAGAGAATGTCTATGCTGAC-3' |
| Tag 6    | +        | 5'-CTTTCCCTACACGACGCTCTTCCGATCT | ATCGATAGAC   | AAGAGAATGTCTATGCTGAC-3' |
| Tag 7    | +        | 5'-CTTTCCCTACACGACGCTCTTCCGATCT | GAGGCTCTAC   | AAGAGAATGTCTATGCTGAC-3' |
| Tag 8    | +        | 5'-CTTTCCCTACACGACGCTCTTCCGATCT | TGCTGATATC   | AAGAGAATGTCTATGCTGAC-3' |
| Rev. REV | -        | 5'-GGAGTTCAGACGTGTGCTCTTCCGATCT |              | CAGACCAATCTTTCCTGAAG-3' |
