# Supplementary material for: Estimating virus effective population size and selection without neutral markers
Source: PubMed Central journal article supplement (PMC5720836; doi:10.1371/journal.ppat.1006702), 2017-11-20
Supplement: ppat.1006702.s010.pdf [file ppat.1006702.s010.pdf]

**Table S3. Estimations of the relative intrinsic rates of increase of the virus variants for the 15 plant genotypes.**

| HD line     | $r_1$ (q-5%) | $r_1$ (mean) | $r_1$ (q-95%) | $r_2$ (q-5%) | $r_2$ (mean) | $r_2$ (q-95%) | $r_3$ (q-5%) | $r_3$ (mean) | $r_3$ (q-95%) | $r_4$ (q-5%) | $r_4$ (mean) | $r_4$ (q-95%) | $r_5$ (q-5%) | $r_5$ (mean) | $r_5$ (q-95%) |
|-------------|--------------|--------------|---------------|--------------|--------------|---------------|--------------|--------------|---------------|--------------|--------------|---------------|--------------|--------------|---------------|
| <b>2123</b> | 0.7386       | 0.7425       | 0.7463        | 0.9630       | 0.9645       | 0.966         | 1.1113       | 1.1124       | 1.1135        | 1.1145       | 1.1156       | 1.1167        | 1.0636       | 1.0647       | 1.0659        |
| <b>2173</b> | 0.7529       | 0.7568       | 0.7608        | 0.9943       | 0.9956       | 0.9969        | 1.0872       | 1.0883       | 1.0894        | 1.1072       | 1.1083       | 1.1094        | 1.0496       | 1.0507       | 1.0518        |
| <b>219</b>  | 0.9019       | 0.9032       | 0.9045        | 1.0358       | 1.0363       | 1.0368        | 1.0357       | 1.0362       | 1.0367        | 1.049        | 1.0495       | 1.0500        | 0.9738       | 0.9745       | 0.9752        |
| <b>221</b>  | 0.8306       | 0.8329       | 0.8351        | 0.9945       | 0.9953       | 0.9962        | 1.0707       | 1.0713       | 1.072         | 1.0728       | 1.0735       | 1.0742        | 1.026        | 1.0267       | 1.0274        |
| <b>2256</b> | 0.8238       | 0.8276       | 0.8314        | 0.9508       | 0.9524       | 0.9539        | 1.0832       | 1.0843       | 1.0854        | 1.072        | 1.0731       | 1.0742        | 1.0613       | 1.0624       | 1.0635        |
| <b>2264</b> | 0.6868       | 0.6922       | 0.6977        | 0.9413       | 0.9434       | 0.9455        | 1.1220       | 1.1235       | 1.1251        | 1.142        | 1.1436       | 1.1451        | 1.0955       | 1.097        | 1.0985        |
| <b>2321</b> | 0.4171       | 0.4350       | 0.4529        | 0.8756       | 0.8814       | 0.8873        | 1.2045       | 1.2095       | 1.2144        | 1.2367       | 1.2418       | 1.2469        | 1.227        | 1.232        | 1.2371        |
| <b>2328</b> | 0.7484       | 0.7526       | 0.7567        | 0.9657       | 0.9673       | 0.9689        | 1.0963       | 1.0975       | 1.0986        | 1.1139       | 1.1151       | 1.1163        | 1.0662       | 1.0674       | 1.0686        |
| <b>2344</b> | 0.5155       | 0.5278       | 0.5400        | 0.9818       | 0.9850       | 0.9883        | 1.148        | 1.1513       | 1.1545        | 1.1919       | 1.1952       | 1.1985        | 1.1373       | 1.1405       | 1.1437        |
| <b>2349</b> | 0.4241       | 0.4403       | 0.4564        | 0.8759       | 0.8809       | 0.8858        | 1.2063       | 1.2107       | 1.2152        | 1.2463       | 1.2509       | 1.2554        | 1.2126       | 1.2171       | 1.2215        |
| <b>2367</b> | 0.8088       | 0.8115       | 0.8141        | 0.9989       | 1.0005       | 1.0011        | 1.0698       | 1.0706       | 1.0715        | 1.0828       | 1.0837       | 1.0845        | 1.0331       | 1.034        | 1.0349        |
| <b>240</b>  | 0.8471       | 0.8493       | 0.8516        | 0.9966       | 0.9976       | 0.9986        | 1.0565       | 1.0573       | 1.0581        | 1.0752       | 1.0759       | 1.0767        | 1.0188       | 1.0196       | 1.0205        |
| <b>2400</b> | 0.7628       | 0.7673       | 0.7719        | 1.0091       | 1.0105       | 1.0119        | 1.1011       | 1.1024       | 1.1036        | 1.1205       | 1.1218       | 1.1231        | 0.9964       | 0.9977       | 0.9991        |
| <b>2426</b> | 0.7460       | 0.7495       | 0.7531        | 0.9832       | 0.9844       | 0.9857        | 1.0913       | 1.0923       | 1.0933        | 1.1079       | 1.109        | 1.11          | 1.0635       | 1.0646       | 1.0656        |
| <b>2430</b> | 0.7541       | 0.7580       | 0.7618        | 0.9620       | 0.9635       | 0.9651        | 1.105        | 1.1062       | 1.1073        | 1.1028       | 1.104        | 1.1051        | 1.067        | 1.0681       | 1.0692        |
