# Supplementary material for: Estimating virus effective population size and selection without neutral markers
Source: PubMed Central journal article supplement (PMC5720836; doi:10.1371/journal.ppat.1006702), 2017-11-20
Supplement: ppat.1006702.s011.pdf [file ppat.1006702.s011.pdf]

**Table S4. Model selection and estimations of the effective population sizes for the 15 plant genotypes.**

| HD line | Posterior probabilities |             |             |             | days 1 to 6 |           |            | days 7 to 10 |           |            | days 11 to 14 |           |            | days 15 to 34 |           |            |
|---------|-------------------------|-------------|-------------|-------------|-------------|-----------|------------|--------------|-----------|------------|---------------|-----------|------------|---------------|-----------|------------|
|         | model 1                 | model 2     | model 3     | model 4     | Ne (q-5%)   | Ne (mean) | Ne (q-95%) | Ne (q-5%)    | Ne (mean) | Ne (q-95%) | Ne (q-5%)     | Ne (mean) | Ne (q-95%) | Ne (q-5%)     | Ne (mean) | Ne (q-95%) |
| 2123    | <b>0.44</b>             | 0.17        | 0.22        | 0.16        | 216         | 349       | 543        | 216          | 349       | 543        | 216           | 349       | 543        | 216           | 349       | 543        |
| 2173    | 0.02                    | 0           | 0.02        | <b>0.96</b> | 96          | 248       | 620        | 98           | 459       | 1951       | 55            | 225       | 1432       | 403           | 1095      | 2310       |
| 219     | 0.14                    | 0.26        | <b>0.32</b> | 0.28        | 10          | 13        | 19         | 11           | 42        | 505        | 11            | 42        | 505        | 31            | 276       | 1909       |
| 221     | 0.24                    | 0.05        | <b>0.43</b> | 0.28        | 237         | 552       | 1213       | 188          | 461       | 1286       | 188           | 461       | 1286       | 616           | 1368      | 2366       |
| 2256    | 0.07                    | 0.03        | <b>0.52</b> | 0.38        | 10          | 13        | 21         | 11           | 43        | 440        | 11            | 43        | 440        | 11            | 61        | 1146       |
| 2264    | <b>0.69</b>             | 0.07        | 0.08        | 0.17        | 252         | 393       | 597        | 252          | 393       | 597        | 252           | 393       | 597        | 252           | 393       | 597        |
| 2321    | 0.00                    | 0.21        | 0.04        | <b>0.74</b> | 776         | 1329      | 2135       | 11           | 20        | 44         | 17            | 148       | 1687       | 64            | 400       | 2025       |
| 2328    | 0.00                    | 0.14        | 0.10        | <b>0.76</b> | 430         | 866       | 1679       | 60           | 135       | 315        | 135           | 590       | 2139       | 181           | 534       | 1711       |
| 2344    | 0.19                    | 0.29        | 0.11        | <b>0.41</b> | 107         | 421       | 1440       | 51           | 201       | 1283       | 72            | 412       | 2009       | 278           | 908       | 2269       |
| 2349    | <b>0.35</b>             | 0.14        | 0.30        | 0.21        | 276         | 462       | 749        | 276          | 462       | 749        | 276           | 462       | 749        | 276           | 462       | 749        |
| 2367    | 0.00                    | 0.35        | 0.31        | <b>0.35</b> | 526         | 883       | 1451       | 43           | 80        | 156        | 92            | 441       | 1989       | 254           | 858       | 2204       |
| 240     | 0.00                    | 0.21        | <b>0.52</b> | 0.27        | 978         | 1515      | 2260       | 127          | 213       | 353        | 127           | 213       | 353        | 307           | 959       | 2275       |
| 2400    | <b>0.84</b>             | 0.07        | 0.05        | 0.04        | 11          | 18        | 31         | 11           | 18        | 31         | 11            | 18        | 31         | 11            | 18        | 31         |
| 2426    | 0.01                    | <b>0.50</b> | 0.24        | 0.26        | 383         | 805       | 1593       | 122          | 235       | 448        | 122           | 235       | 448        | 122           | 235       | 448        |
| 2430    | 0.07                    | 0.23        | <b>0.47</b> | 0.23        | 61          | 1130      | 1971       | 165          | 308       | 601        | 165           | 308       | 601        | 420           | 1077      | 2269       |
